# Supplementary material for: Selection and Validation of miRNA Reference Genes by Quantitative Real-Time PCR Analysis in Paeonia suffruticosa
Source: MDPI journal article supplement (doi:10.3390/horticulturae9020148), 2023-01-22
Supplement: s1 [file s1]

**Table S1.** Description of candidate reference miRNAs in the bud development process of ‘Feng Dan’ based on BestKeeper.

|                    | geo Mean<br>[Ct] | ar Mean<br>[Ct] | min [Ct] | max [Ct] | std dev<br>[± Ct] | CV [% Ct] | Min<br>[x-fold] | Max<br>[x-fold] | std dev<br>[± x-fold] | coeff. Of<br>corr. [r] | <i>p</i> -value |
|--------------------|------------------|-----------------|----------|----------|-------------------|-----------|-----------------|-----------------|-----------------------|------------------------|-----------------|
| gma-miR394a-5p     | 21.53            | 21.57           | 20.44    | 25.18    | 0.86              | 4.01      | -2.13           | 12.55           | 1.82                  | 1.00                   | 0.001           |
| PC-3p-70893        | 25.90            | 25.93           | 24.90    | 29.23    | 0.78              | 3.03      | -2.00           | 10.04           | 1.72                  | 0.98                   | 0.001           |
| mtr-MIR160b-p3     | 24.79            | 24.81           | 23.52    | 27.70    | 0.80              | 3.23      | -2.41           | 7.53            | 1.74                  | 0.97                   | 0.001           |
| PC-5p-19095        | 20.79            | 20.82           | 19.12    | 23.45    | 0.85              | 4.11      | -3.17           | 6.34            | 1.81                  | 0.94                   | 0.001           |
| mtr-miR171e-3p     | 21.48            | 21.52           | 19.78    | 24.30    | 1.13              | 5.23      | -3.25           | 7.06            | 2.18                  | 0.92                   | 0.001           |
| mtr-miR166a        | 20.49            | 20.54           | 18.72    | 23.42    | 1.18              | 5.73      | -3.41           | 7.61            | 2.26                  | 0.92                   | 0.001           |
| PC-5p-74547        | 22.67            | 22.73           | 20.97    | 26.82    | 1.14              | 5.00      | -3.25           | 17.74           | 2.20                  | 0.97                   | 0.001           |
| PC-3p-25825        | 21.15            | 21.20           | 19.91    | 25.20    | 1.06              | 5.02      | -2.37           | 16.53           | 2.09                  | 0.93                   | 0.001           |
| PC-3p-1770         | 20.76            | 20.82           | 19.10    | 25.06    | 1.14              | 5.50      | -3.16           | 19.68           | 2.21                  | 0.96                   | 0.001           |
| mtr-miR168b        | 17.89            | 17.92           | 17.11    | 21.01    | 0.70              | 3.93      | -1.72           | 8.68            | 1.63                  | 0.89                   | 0.001           |
| PC-3p-871          | 23.91            | 23.93           | 22.99    | 26.17    | 0.66              | 2.75      | -1.90           | 4.77            | 1.58                  | 0.58                   | 0.104           |
| PC-5p-55716        | 19.40            | 19.46           | 17.57    | 23.46    | 1.10              | 5.67      | -3.55           | 16.70           | 2.15                  | 0.68                   | 0.044           |
| U6                 | 12.97            | 13.06           | 11.48    | 16.26    | 1.32              | 10.13     | -2.80           | 9.81            | 2.50                  | 0.96                   | 0.001           |
| PC-5p-4            | 15.74            | 15.82           | 13.44    | 18.58    | 1.36              | 8.57      | -4.92           | 7.17            | 2.56                  | 0.94                   | 0.001           |
| rco-miR167a        | 22.35            | 22.45           | 19.81    | 26.36    | 1.87              | 8.32      | -5.82           | 16.11           | 3.65                  | 0.81                   | 0.009           |
| mtr-miR159a_1ss9GT | 18.93            | 18.96           | 17.90    | 21.40    | 0.91              | 4.79      | -2.04           | 5.54            | 1.88                  | 0.70                   | 0.038           |
| mtr-miR159a        | 16.14            | 16.20           | 14.36    | 19.28    | 1.08              | 6.67      | -3.45           | 8.79            | 2.12                  | 0.74                   | 0.021           |
| mtr-miR159a_L-1    | 16.05            | 16.11           | 14.69    | 19.28    | 1.19              | 7.39      | -2.57           | 9.37            | 2.28                  | 0.73                   | 0.024           |

**Table S2.** Description of candidate reference miRNAs in the bud development process of ‘Lian He’ based on BestKeeper.

|                    | geo Mean<br>[Ct] | ar Mean<br>[Ct] | min [Ct] | max [Ct] | std dev<br>[± Ct] | CV [% Ct] | Min<br>[x-fold] | Max<br>[x-fold] | std dev<br>[± x-fold] | coeff. Of<br>corr. [r] | <i>p</i> -value |
|--------------------|------------------|-----------------|----------|----------|-------------------|-----------|-----------------|-----------------|-----------------------|------------------------|-----------------|
| gma-miR394a-5p     | 22.65            | 22.70           | 21.25    | 25.16    | 1.32              | 5.83      | -2.64           | 5.69            | 2.50                  | 0.98                   | 0.001           |
| PC-5p-19095        | 21.73            | 21.76           | 20.47    | 23.48    | 1.19              | 5.48      | -2.38           | 3.37            | 2.28                  | 0.99                   | 0.001           |
| mtr-miR171e-3p     | 22.32            | 22.37           | 20.61    | 24.98    | 1.36              | 6.10      | -3.27           | 6.33            | 2.58                  | 0.96                   | 0.001           |
| PC-3p-70893        | 26.65            | 26.68           | 25.09    | 29.36    | 1.28              | 4.81      | -2.95           | 6.57            | 2.43                  | 0.95                   | 0.001           |
| mtr-MIR160b-p3     | 26.01            | 26.04           | 24.38    | 28.21    | 1.12              | 4.31      | -3.09           | 4.61            | 2.18                  | 0.97                   | 0.001           |
| mtr-miR166a        | 21.86            | 21.91           | 19.58    | 24.11    | 1.45              | 6.63      | -4.86           | 4.76            | 2.74                  | 0.94                   | 0.001           |
| PC-3p-871          | 25.67            | 25.70           | 23.71    | 27.87    | 1.23              | 4.77      | -3.88           | 4.60            | 2.34                  | 0.89                   | 0.001           |
| PC-5p-74547        | 23.66            | 23.73           | 22.14    | 27.43    | 1.61              | 6.77      | -2.87           | 13.59           | 3.05                  | 0.91                   | 0.001           |
| mtr-miR168b        | 18.96            | 19.00           | 17.62    | 21.25    | 1.02              | 5.36      | -2.54           | 4.91            | 2.03                  | 0.74                   | 0.024           |
| mtr-miR159a_1ss9GT | 19.78            | 19.81           | 18.67    | 22.36    | 0.83              | 4.20      | -2.16           | 5.97            | 1.78                  | 0.73                   | 0.025           |
| rco-miR167a        | 24.17            | 24.24           | 20.80    | 26.98    | 1.27              | 5.22      | -10.37          | 7.02            | 2.40                  | 0.88                   | 0.002           |
| mtr-miR159a_L-1    | 17.76            | 17.84           | 15.90    | 21.31    | 1.52              | 8.51      | -3.64           | 11.71           | 2.87                  | 0.93                   | 0.001           |
| PC-5p-4            | 17.43            | 17.54           | 14.68    | 21.64    | 1.58              | 9.02      | -6.72           | 18.46           | 2.99                  | 0.93                   | 0.001           |
| mtr-miR159a        | 17.42            | 17.49           | 15.53    | 21.39    | 1.21              | 6.93      | -3.72           | 15.65           | 2.32                  | 0.85                   | 0.004           |
| PC-3p-25825        | 22.01            | 22.07           | 19.54    | 25.40    | 1.33              | 6.02      | -5.54           | 10.50           | 2.51                  | 0.33                   | 0.383           |
| PC-5p-55716        | 20.39            | 20.45           | 18.79    | 23.25    | 1.29              | 6.31      | -3.04           | 7.27            | 2.45                  | 0.59                   | 0.095           |
| PC-3p-1770         | 22.97            | 23.07           | 20.66    | 25.63    | 1.99              | 8.64      | -4.95           | 6.33            | 3.98                  | 0.71                   | 0.032           |
| U6                 | 15.42            | 15.67           | 12.37    | 22.64    | 2.23              | 14.26     | -8.24           | 150.07          | 4.71                  | 0.91                   | 0.001           |

**Table S3.** Description of candidate reference miRNAs in flower development stages of ‘Feng Dan’ based on BestKeeper.

|                    | geo Mean<br>[Ct] | ar Mean<br>[Ct] | min [Ct] | max [Ct] | std dev<br>[± Ct] | CV [% Ct] | Min<br>[x-fold] | Max<br>[x-fold] | std dev<br>[± x-fold] | coeff. Of<br>corr. [r] | <i>p</i> -value |
|--------------------|------------------|-----------------|----------|----------|-------------------|-----------|-----------------|-----------------|-----------------------|------------------------|-----------------|
| PC-5p-4            | 17.63            | 17.64           | 16.37    | 18.34    | 0.46              | 2.58      | -2.40           | 1.63            | 1.37                  | 0.82                   | 0.023           |
| PC-3p-871          | 27.86            | 27.87           | 26.32    | 28.80    | 0.51              | 1.83      | -2.91           | 1.91            | 1.43                  | 0.80                   | 0.031           |
| mtr-MIR160b-p3     | 28.05            | 28.06           | 27.02    | 28.49    | 0.37              | 1.33      | -2.04           | 1.36            | 1.30                  | 0.86                   | 0.012           |
| mtr-miR166a        | 23.78            | 23.79           | 22.40    | 25.03    | 0.58              | 2.45      | -2.60           | 2.38            | 1.50                  | 0.92                   | 0.003           |
| mtr-miR168b        | 22.26            | 22.28           | 20.84    | 23.16    | 0.57              | 2.56      | -2.68           | 1.86            | 1.49                  | 0.98                   | 0.001           |
| mtr-miR159a        | 16.37            | 16.40           | 14.76    | 17.77    | 0.65              | 3.97      | -3.06           | 2.63            | 1.57                  | 0.95                   | 0.001           |
| gma-miR394a-5p     | 25.97            | 25.97           | 25.54    | 26.51    | 0.29              | 1.11      | -1.35           | 1.45            | 1.22                  | 0.49                   | 0.263           |
| PC-5p-74547        | 26.65            | 26.65           | 26.16    | 27.04    | 0.30              | 1.14      | -1.41           | 1.31            | 1.23                  | 0.09                   | 0.849           |
| PC-3p-25825        | 24.63            | 24.64           | 23.53    | 25.48    | 0.50              | 2.04      | -2.14           | 1.80            | 1.42                  | 0.60                   | 0.156           |
| PC-5p-19095        | 26.30            | 26.31           | 24.80    | 27.18    | 0.73              | 2.78      | -2.82           | 1.84            | 1.66                  | 0.71                   | 0.074           |
| mtr-miR159a_L-1    | 16.33            | 16.38           | 14.30    | 18.33    | 0.96              | 5.89      | -4.09           | 3.97            | 1.95                  | 0.95                   | 0.001           |
| mtr-miR159a_1ss9GT | 19.93            | 19.97           | 17.88    | 21.57    | 1.04              | 5.22      | -4.13           | 3.12            | 2.06                  | 0.95                   | 0.001           |
| U6                 | 24.63            | 24.65           | 22.81    | 26.25    | 0.80              | 3.25      | -3.52           | 3.06            | 1.74                  | 0.83                   | 0.020           |
| rco-miR167a        | 28.23            | 28.27           | 26.24    | 30.62    | 1.13              | 3.99      | -3.98           | 5.23            | 2.19                  | 0.97                   | 0.001           |
| PC-3p-1770         | 25.67            | 25.69           | 23.89    | 27.11    | 0.81              | 3.16      | -3.43           | 2.72            | 1.76                  | 0.75                   | 0.050           |
| mtr-miR171e-3p     | 23.99            | 24.02           | 22.49    | 26.31    | 0.90              | 3.73      | -2.84           | 4.99            | 1.86                  | 0.64                   | 0.125           |
| PC-3p-70893        | 29.34            | 29.36           | 28.35    | 30.83    | 0.81              | 2.76      | -1.98           | 2.80            | 1.75                  | -0.04                  | 0.924           |
| PC-5p-55716        | 25.01            | 25.08           | 21.00    | 27.00    | 1.30              | 5.20      | -16.16          | 3.95            | 2.47                  | 0.83                   | 0.021           |

**Table S4.** Description of candidate reference miRNAs in flower development stages of ‘Lian He’ based on BestKeeper.

|                    | geo Mean<br>[Ct] | ar Mean<br>[Ct] | min [Ct] | max [Ct] | std dev<br>[± Ct] | CV [% Ct] | Min<br>[x-fold] | Max<br>[x-fold] | std dev<br>[± x-fold] | coeff. Of<br>corr. [ <i>r</i> ] | <i>p</i> -value |
|--------------------|------------------|-----------------|----------|----------|-------------------|-----------|-----------------|-----------------|-----------------------|---------------------------------|-----------------|
| rco-miR167a        | 27.77            | 27.78           | 26.61    | 29.07    | 0.85              | 3.04      | -2.23           | 2.47            | 1.80                  | 0.86                            | 0.013           |
| mtr-miR159a_1ss9GT | 20.11            | 20.12           | 19.20    | 21.00    | 0.63              | 3.11      | -1.88           | 1.86            | 1.54                  | 0.80                            | 0.030           |
| mtr-miR159a        | 15.63            | 15.65           | 14.30    | 16.56    | 0.73              | 4.69      | -2.51           | 1.92            | 1.66                  | 0.94                            | 0.002           |
| U6                 | 17.87            | 17.89           | 16.62    | 19.06    | 0.58              | 3.26      | -2.39           | 2.28            | 1.50                  | 0.86                            | 0.014           |
| PC-5p-4            | 18.26            | 18.30           | 16.30    | 19.76    | 0.96              | 5.26      | -3.90           | 2.84            | 1.95                  | 0.94                            | 0.001           |
| PC-5p-19095        | 24.05            | 24.07           | 22.31    | 24.83    | 0.53              | 2.19      | -3.35           | 1.72            | 1.44                  | 0.68                            | 0.090           |
| PC-3p-1770         | 24.87            | 24.90           | 22.18    | 26.55    | 0.81              | 3.25      | -6.45           | 3.21            | 1.75                  | 0.86                            | 0.014           |
| mtr-miR171e-3p     | 22.76            | 22.80           | 20.53    | 24.60    | 1.32              | 5.80      | -4.69           | 3.58            | 2.50                  | 0.97                            | 0.001           |
| mtr-MIR160b-p3     | 30.62            | 30.67           | 27.38    | 32.59    | 1.40              | 4.57      | -9.43           | 3.91            | 2.64                  | 0.94                            | 0.001           |
| PC-3p-70893        | 29.99            | 30.04           | 27.59    | 31.99    | 1.47              | 4.89      | -5.29           | 3.99            | 2.77                  | 0.92                            | 0.003           |
| PC-3p-871          | 27.07            | 27.13           | 24.93    | 28.73    | 1.66              | 6.12      | -4.43           | 3.16            | 3.16                  | 0.98                            | 0.001           |
| mtr-miR168b        | 20.32            | 20.37           | 18.28    | 22.26    | 1.32              | 6.46      | -4.11           | 3.83            | 2.49                  | 0.83                            | 0.022           |
| PC-5p-55716        | 22.77            | 22.82           | 20.64    | 25.05    | 1.33              | 5.83      | -4.38           | 4.84            | 2.51                  | 0.69                            | 0.086           |
| PC-3p-25825        | 22.83            | 22.92           | 20.31    | 25.17    | 1.91              | 8.35      | -5.74           | 5.08            | 3.77                  | 0.96                            | 0.001           |
| gma-miR394a-5p     | 25.79            | 25.85           | 23.36    | 28.30    | 1.59              | 6.15      | -5.38           | 5.69            | 3.01                  | 0.98                            | 0.001           |
| mtr-miR159a_L-1    | 17.29            | 17.32           | 15.16    | 18.41    | 0.86              | 4.98      | -4.36           | 2.17            | 1.82                  | 0.48                            | 0.270           |
| PC-5p-74547        | 27.55            | 27.64           | 24.76    | 30.52    | 2.03              | 7.33      | -6.93           | 7.82            | 4.07                  | 0.97                            | 0.001           |
| mtr-miR166a        | 23.46            | 23.54           | 20.84    | 25.96    | 1.60              | 6.79      | -6.12           | 5.67            | 3.03                  | 0.60                            | 0.156           |

**Table S5.** Description of candidate reference miRNAs in different tissues of ‘Feng Dan’ based on BestKeeper.

|                    | geo Mean<br>[Ct] | ar Mean<br>[Ct] | min [Ct] | max [Ct] | std dev<br>[± Ct] | CV [% Ct] | Min<br>[x-fold] | Max<br>[x-fold] | std dev<br>[± x-fold] | coeff. Of<br>corr. [r] | <i>p</i> -value |
|--------------------|------------------|-----------------|----------|----------|-------------------|-----------|-----------------|-----------------|-----------------------|------------------------|-----------------|
| PC-5p-74547        | 28.57            | 28.60           | 25.75    | 29.78    | 1.22              | 4.26      | -7.03           | 2.32            | 2.33                  | 0.95                   | 0.001           |
| PC-3p-1770         | 24.72            | 24.77           | 22.34    | 26.26    | 1.27              | 5.12      | -5.23           | 2.91            | 2.41                  | 1.00                   | 0.001           |
| gma-miR394a-5p     | 25.81            | 25.84           | 23.84    | 27.30    | 0.90              | 3.47      | -3.92           | 2.80            | 1.86                  | 0.94                   | 0.002           |
| mtr-MIR160b-p3     | 29.13            | 29.16           | 26.40    | 30.63    | 1.08              | 3.71      | -6.63           | 2.82            | 2.12                  | 0.81                   | 0.027           |
| mtr-miR171e-3p     | 23.99            | 24.01           | 23.08    | 25.42    | 0.72              | 2.99      | -1.88           | 2.68            | 1.64                  | 0.89                   | 0.007           |
| PC-3p-871          | 26.11            | 26.11           | 25.18    | 26.53    | 0.37              | 1.42      | -1.90           | 1.34            | 1.29                  | 0.81                   | 0.027           |
| PC-5p-4            | 17.97            | 17.98           | 17.30    | 19.24    | 0.68              | 3.79      | -1.58           | 2.41            | 1.60                  | 0.55                   | 0.199           |
| PC-5p-55716        | 24.18            | 24.23           | 22.22    | 26.19    | 1.39              | 5.75      | -3.89           | 4.03            | 2.63                  | 0.80                   | 0.030           |
| PC-3p-25825        | 25.15            | 25.23           | 22.05    | 27.30    | 1.76              | 6.99      | -8.52           | 4.45            | 3.40                  | 0.98                   | 0.001           |
| mtr-miR168b        | 21.87            | 21.93           | 19.94    | 25.41    | 1.18              | 5.39      | -3.82           | 11.63           | 2.27                  | 0.75                   | 0.052           |
| PC-5p-19095        | 23.00            | 23.02           | 22.09    | 24.75    | 0.84              | 3.63      | -1.89           | 3.34            | 1.78                  | -0.21                  | 0.651           |
| PC-3p-70893        | 32.69            | 32.78           | 28.53    | 35.33    | 2.02              | 6.15      | -17.91          | 6.26            | 4.05                  | -0.38                  | 0.400           |
| U6                 | 17.76            | 17.80           | 16.04    | 20.22    | 0.96              | 5.40      | -3.29           | 5.49            | 1.95                  | 0.56                   | 0.191           |
| mtr-miR166a        | 20.38            | 20.43           | 18.14    | 22.03    | 1.17              | 5.71      | -4.73           | 3.15            | 2.24                  | 0.38                   | 0.405           |
| rco-miR167a        | 24.88            | 24.97           | 22.78    | 28.66    | 1.88              | 7.55      | -4.31           | 13.69           | 3.69                  | 0.45                   | 0.306           |
| mtr-miR159a_L-1    | 17.03            | 17.14           | 15.04    | 21.75    | 1.68              | 9.80      | -3.96           | 26.33           | 3.21                  | 0.90                   | 0.005           |
| mtr-miR159a_1ss9GT | 20.70            | 20.81           | 18.25    | 25.19    | 1.68              | 8.07      | -5.47           | 22.35           | 3.20                  | 0.89                   | 0.007           |
| mtr-miR159a        | 15.65            | 15.80           | 13.60    | 21.05    | 1.64              | 10.40     | -4.16           | 42.00           | 3.12                  | 0.84                   | 0.019           |

**Table S6.** Description of candidate reference miRNAs in flower development stages of ‘Lian He’ based on BestKeeper.

|                    | geo Mean<br>[Ct] | ar Mean<br>[Ct] | min [Ct] | max [Ct] | std dev<br>[± Ct] | CV [% Ct] | Min<br>[x-fold] | Max<br>[x-fold] | std dev<br>[± x-fold] | coeff. Of<br>corr. [r] | <i>p</i> -value |
|--------------------|------------------|-----------------|----------|----------|-------------------|-----------|-----------------|-----------------|-----------------------|------------------------|-----------------|
| mtr-miR171e-3p     | 23.96            | 24.00           | 22.12    | 26.22    | 1.33              | 5.55      | -3.58           | 4.81            | 2.52                  | 0.90                   | 0.005           |
| PC-3p-871          | 27.26            | 27.30           | 24.63    | 29.11    | 1.27              | 4.66      | -6.20           | 3.60            | 2.41                  | 0.94                   | 0.001           |
| PC-3p-25825        | 24.49            | 24.52           | 23.28    | 26.99    | 0.97              | 3.95      | -2.31           | 5.63            | 1.96                  | 0.84                   | 0.019           |
| mtr-miR159a_L-1    | 17.67            | 17.71           | 15.90    | 19.89    | 0.80              | 4.54      | -3.43           | 4.66            | 1.75                  | 0.75                   | 0.051           |
| PC-5p-4            | 18.58            | 18.61           | 16.87    | 20.19    | 1.01              | 5.40      | -3.27           | 3.05            | 2.01                  | 0.84                   | 0.019           |
| mtr-miR168b        | 21.33            | 21.35           | 20.04    | 23.15    | 0.94              | 4.41      | -2.44           | 3.54            | 1.92                  | 0.89                   | 0.007           |
| PC-3p-70893        | 31.14            | 31.19           | 29.27    | 34.47    | 1.52              | 4.88      | -3.67           | 10.09           | 2.87                  | 0.93                   | 0.003           |
| gma-miR394a-5p     | 25.84            | 25.87           | 24.53    | 28.53    | 1.00              | 3.85      | -2.48           | 6.43            | 1.99                  | 0.83                   | 0.020           |
| PC-5p-55716        | 24.43            | 24.45           | 22.94    | 26.19    | 0.68              | 2.76      | -2.81           | 3.38            | 1.60                  | 0.74                   | 0.059           |
| mtr-miR159a        | 15.42            | 15.44           | 14.58    | 17.48    | 0.69              | 4.44      | -1.78           | 4.18            | 1.61                  | 0.52                   | 0.232           |
| PC-5p-19095        | 25.09            | 25.10           | 24.47    | 26.24    | 0.48              | 1.92      | -1.54           | 2.21            | 1.40                  | -0.61                  | 0.144           |
| mtr-MIR160b-p3     | 29.49            | 29.53           | 26.06    | 31.06    | 1.26              | 4.27      | -10.74          | 2.97            | 2.40                  | 0.28                   | 0.544           |
| PC-3p-1770         | 26.03            | 26.09           | 22.17    | 28.03    | 1.19              | 4.57      | -14.49          | 4.01            | 2.29                  | 0.63                   | 0.132           |
| mtr-miR166a        | 22.93            | 22.96           | 20.75    | 24.01    | 1.02              | 4.46      | -4.52           | 2.12            | 2.03                  | 0.40                   | 0.372           |
| mtr-miR159a_1ss9GT | 21.53            | 21.70           | 18.70    | 26.92    | 2.45              | 11.27     | -7.10           | 42.07           | 5.45                  | 0.36                   | 0.424           |
| U6                 | 20.00            | 20.20           | 17.08    | 24.43    | 2.70              | 13.37     | -7.55           | 21.62           | 6.50                  | 0.09                   | 0.842           |
| rco-miR167a        | 25.92            | 26.08           | 20.25    | 29.64    | 2.02              | 7.73      | -50.82          | 13.14           | 4.05                  | -0.35                  | 0.439           |
| PC-5p-74547        | 26.04            | 26.55           | 15.57    | 29.34    | 3.14              | 11.82     | -1414.85        | 9.89            | 8.80                  | 0.51                   | 0.247           |

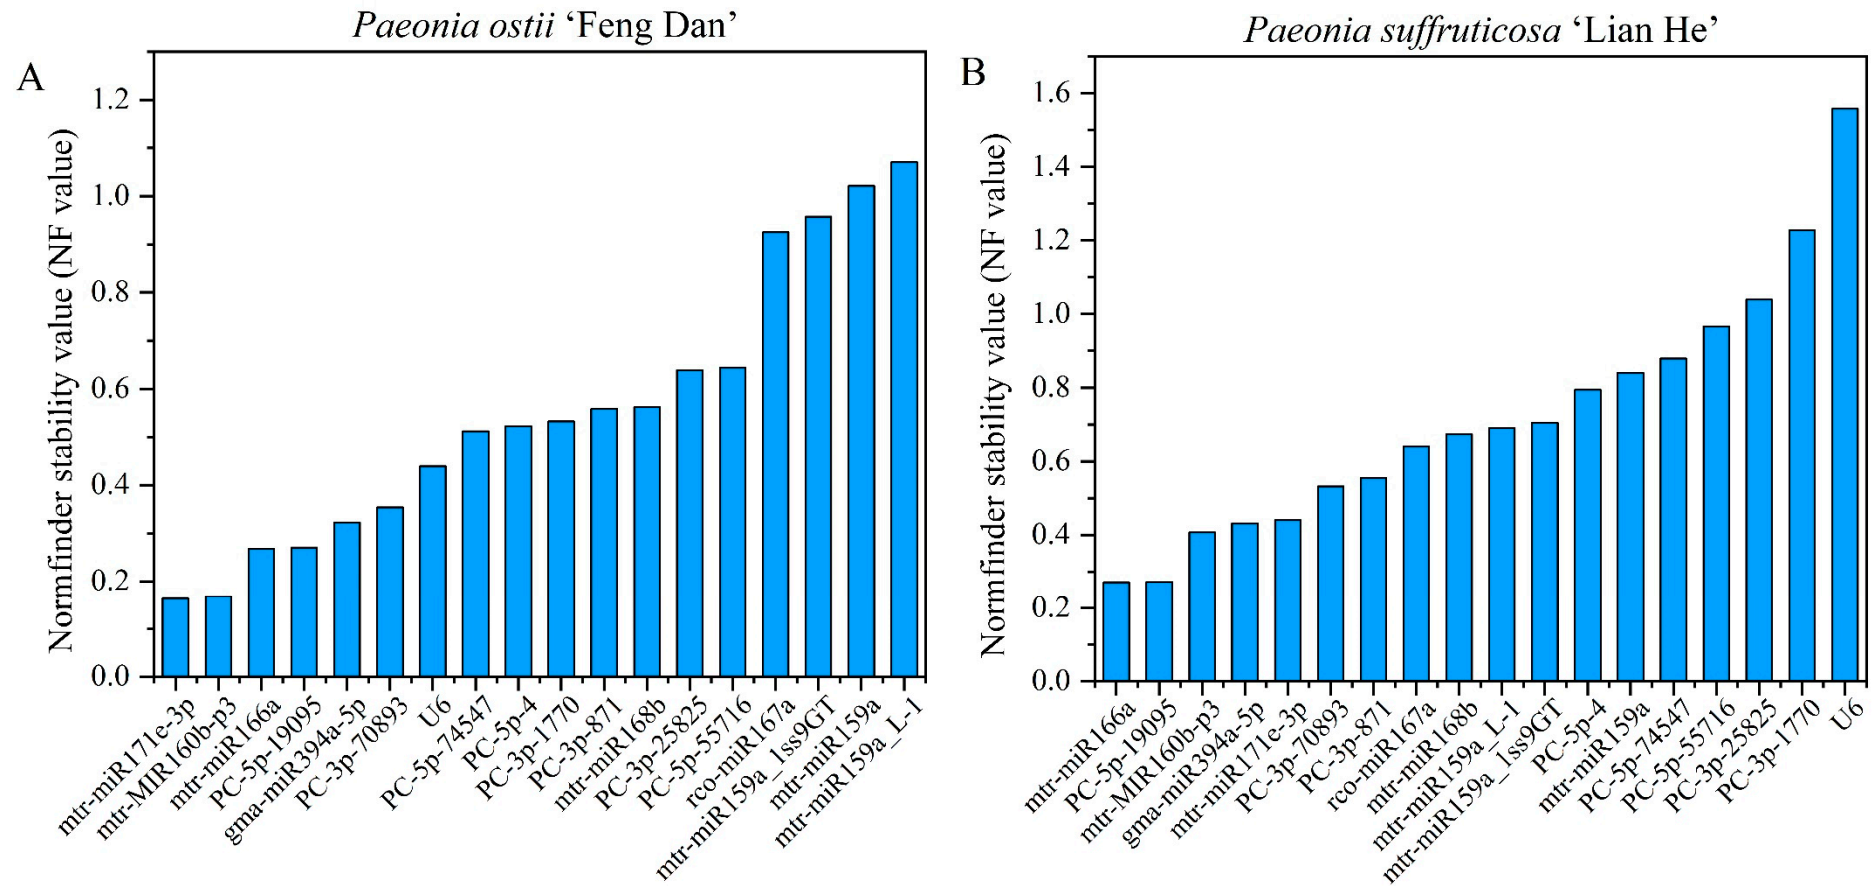

**Figure S1.** Expression stability analysis of candidate reference miRNAs in the bud development process calculated by NormFinder.

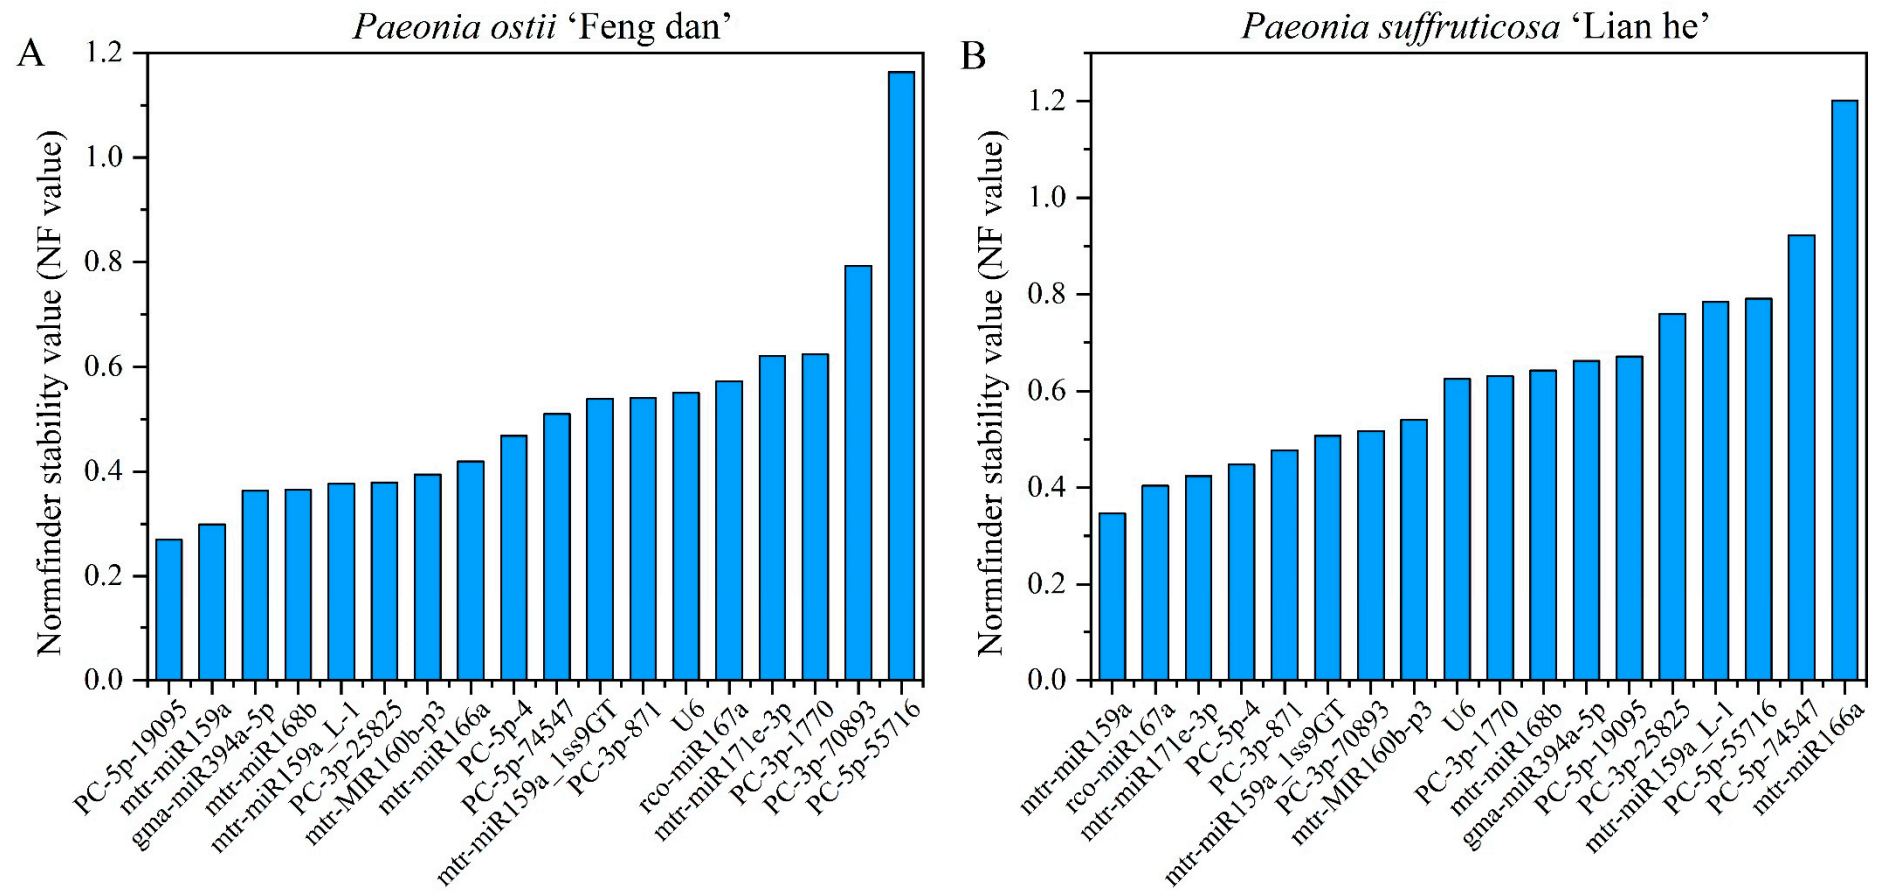

**Figure S2.** Expression stability analysis of candidate reference miRNAs in flower development stages calculated by NormFinder.



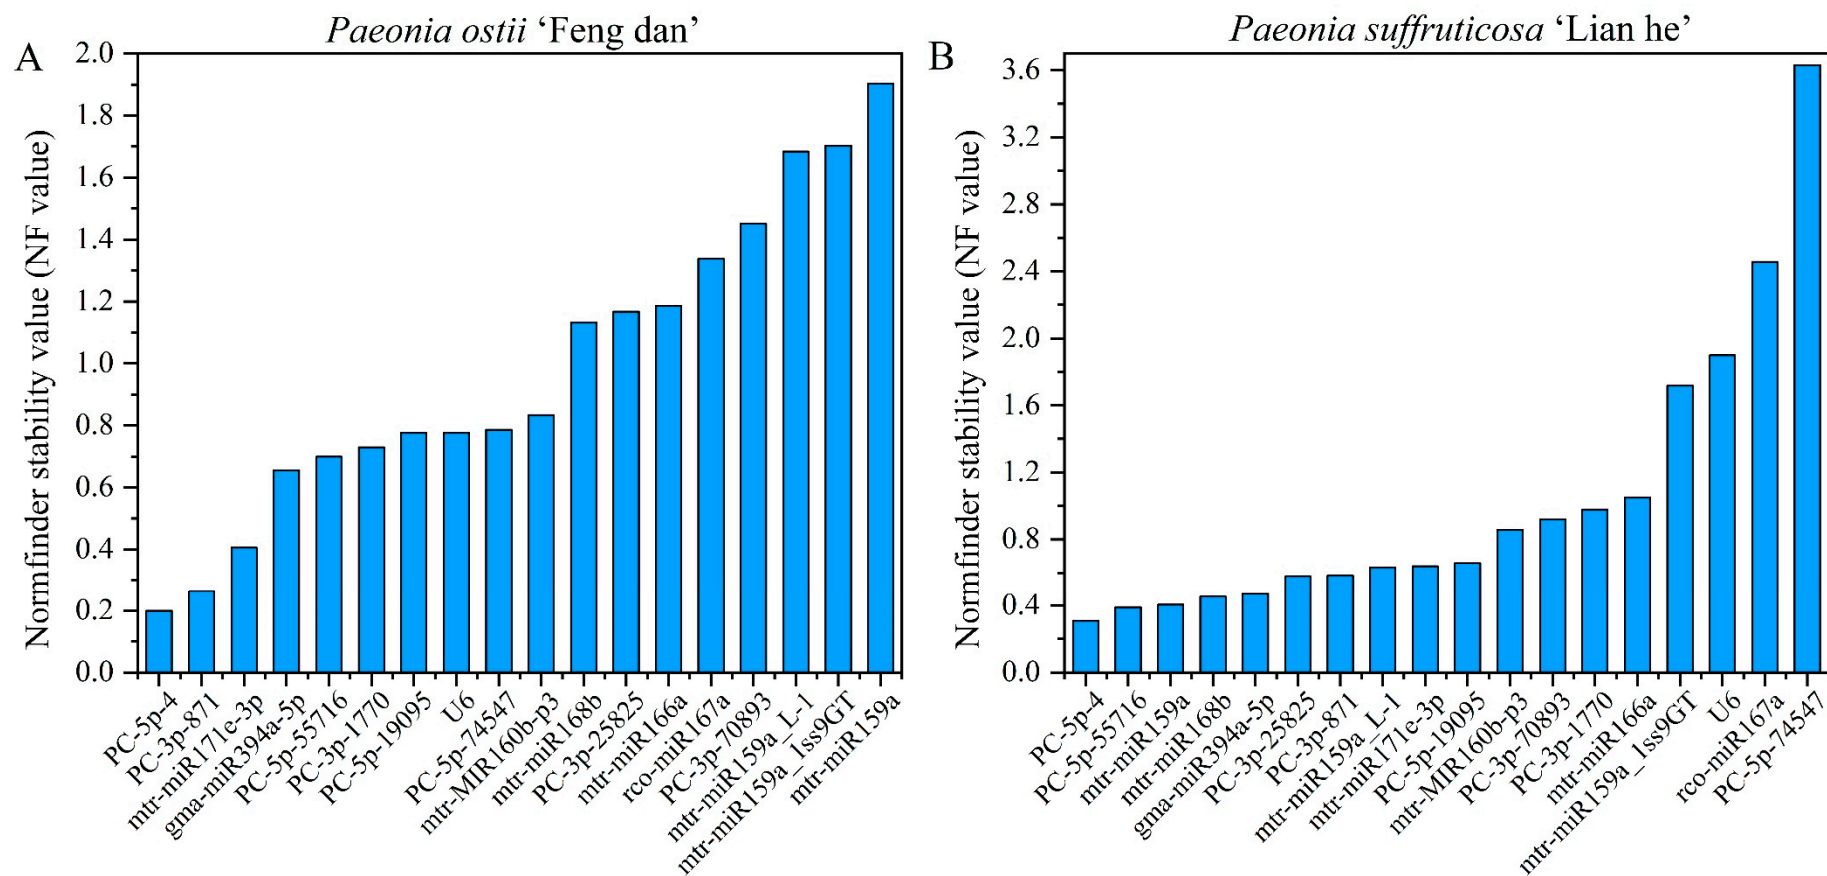

**Figure S3.** Expression stability analysis of candidate reference miRNAs in different tissues calculated by NormFinder.
